# Supplementary material
Source: PubMed Central journal article supplement (PMC4703104)
Supplement: NIHMS747726-supplement-2.pdf [file NIHMS747726-supplement-2.pdf]

## Supporting Information

### Discovery, Synthesis and Molecular Pharmacology of Selective Positive Allosteric Modulators of the $\delta$ -Opioid Receptor

Neil T. Burford<sup>1</sup>, Kathryn E. Livingston<sup>2</sup>, Meritxell Canals<sup>3</sup>, Molly Ryan<sup>4</sup>, Lauren Budenholzer<sup>4</sup>, Ying Han<sup>1</sup>, Yi Shang<sup>5</sup>, John J. Herbst<sup>1</sup>, Jonathan O'Connell<sup>6</sup>, Martyn Banks<sup>1</sup>, Litao Zhang<sup>1</sup>, Marta Filizola<sup>5</sup>, Daniel Bassoni<sup>7</sup>, Tom S. Wehrman<sup>8</sup>, Arthur Christopoulos<sup>3</sup>, John R. Traynor<sup>2</sup>, Samuel W. Gerritz<sup>1</sup>, Andrew Alt<sup>1</sup>.

Contents:

Table S1, S2, S3 and S4

Figures S1, S2 and S3

Table S1. Physicochemical properties displaying non-zero variance across the 15 ligands of Table 1

| Physicochemical Property | Description (taken from the QikProp 4.2 user manual)                                                                                                                                                        |
|--------------------------|-------------------------------------------------------------------------------------------------------------------------------------------------------------------------------------------------------------|
| X.stars                  | Number of property or descriptor values that fall outside the 95% range of similar values for known drugs.                                                                                                  |
| X.rotor                  | Number of non-trivial (not CX3), non-hindered (not alkene, amide, small ring) rotatable bonds.                                                                                                              |
| CNS                      | Predicted central nervous system activity on a -2 (inactive) to +2 (active) scale.                                                                                                                          |
| mol.MW                   | Molecular weight of the molecule.                                                                                                                                                                           |
| dipole                   | Computed dipole moment of the molecule.                                                                                                                                                                     |
| SASA                     | Total solvent accessible surface area (SASA) in square angstroms using a probe with a 1.4 Å radius.                                                                                                         |
| FOSA                     | Hydrophobic component of the SASA (saturated carbon and attached hydrogen).                                                                                                                                 |
| FISA                     | Hydrophilic component of the SASA (SASA on N, O, H on heteroatoms, carbonyl C).                                                                                                                             |
| PISA                     | $\pi$ (carbon and attached hydrogen) component of the SASA.                                                                                                                                                 |
| WPSA                     | Weakly polar component of the SASA (halogens, P, and S).                                                                                                                                                    |
| volume                   | Total solvent-accessible volume in cubic angstroms using a probe with a 1.4 Å radius.                                                                                                                       |
| donorHB                  | Estimated number of hydrogen bonds that would be donated by the solute to water molecules in an aqueous solution. Values are averages taken over a number of configurations, so they can be non-integer.    |
| accptHB                  | Estimated number of hydrogen bonds that would be accepted by the solute from water molecules in an aqueous solution. Values are averages taken over a number of configurations, so they can be non-integer. |
| dip.2.V                  | Square of the dipole moment divided by the molecular volume. This is the key term in the Kirkwood-Onsager equation for the free energy of solvation of a dipole with volume V.                              |
| ACxDN..5.SA              | Index of cohesive interaction in solids. This term represents the relationship $((accptHB(\sqrt{donorHB}))/SA)$ .                                                                                           |
| glob                     | Globularity descriptor, $(4\pi r^2)/(SASA)$ , where r is the radius of a sphere with a volume equal to the molecular volume. Globularity is 1.0 for a spherical molecule.                                   |
| QPpolrz                  | Predicted polarizability in cubic angstroms.                                                                                                                                                                |
| QPlogPC16                | Predicted hexadecane/gas partition coefficient.                                                                                                                                                             |
| QPlogPoct                | Predicted octanol/gas partition coefficient.                                                                                                                                                                |
| QPlogPw                  | Predicted water/gas partition coefficient.                                                                                                                                                                  |
| QPlogPo.w                | Predicted octanol/water partition coefficient.                                                                                                                                                              |
| QPlogS                   | Predicted aqueous solubility, log S. S in mol dm <sup>-3</sup> is the concentration of the solute in a saturated solution that is in equilibrium with the crystalline solid.                                |
| CIQPlogS                 | Conformation-independent predicted aqueous solubility,                                                                                                                                                      |

|            |                                                                                                                                                                                                                                                   |
|------------|---------------------------------------------------------------------------------------------------------------------------------------------------------------------------------------------------------------------------------------------------|
|            | log S. S in mol dm <sup>-3</sup> is the concentration of the solute in a saturated solution that is in equilibrium with the crystalline solid.                                                                                                    |
| QPlogHERG  | Predicted IC50 value for blockage of HERG K <sup>+</sup> channels.                                                                                                                                                                                |
| QPPCaco    | Predicted apparent Caco-2 cell permeability in nm/sec. Caco-2 cells are a model for the gut-blood barrier. QikProp predictions are for non-active transport.                                                                                      |
| QPlogBB    | Predicted brain/blood partition coefficient. Note: QikProp predictions are for orally delivered drugs so, for example, dopamine and serotonin are CNS negative because they are too polar to cross the blood-brain barrier.                       |
| QPPMDCK    | Predicted apparent MDCK cell permeability in nm/sec. MDCK cells are considered to be a good mimic for the bloodbrain barrier. QikProp predictions are for non-active transport.                                                                   |
| QPlogKp    | Predicted skin permeability, log Kp.                                                                                                                                                                                                              |
| IP.eV.     | PM3 calculated ionization potential (negative of HOMO energy).                                                                                                                                                                                    |
| EA.eV.     | PM3 calculated electron affinity (negative of LUMO energy).                                                                                                                                                                                       |
| X.metab    | Number of likely metabolic reactions.                                                                                                                                                                                                             |
| QPlogKhsa  | Prediction of binding to human serum albumin.                                                                                                                                                                                                     |
| PercHOA    | Predicted human oral absorption on 0 to 100% scale. The prediction is based on a quantitative multiple linear regression model. This property usually correlates well with HumanOral-Absorption, as both measure the same property.               |
| SAfluorine | Solvent-accessible surface area of fluorine atoms.                                                                                                                                                                                                |
| PSA        | Van der Waals surface area of polar nitrogen and oxygen atoms and carbonyl carbon atoms.                                                                                                                                                          |
| X.NandO    | Number of nitrogen and oxygen atoms.                                                                                                                                                                                                              |
| RuleOfFive | Number of violations of Lipinski's rule of five. The rules are: mol_MW < 500, QPlogPo/w < 5, donorHB ≤ 5, accptHB ≤ 10. Compounds that satisfy these rules are considered drug-like. (The "five" refers to the limits, which are multiples of 5.) |
| X.nonHatm  | Number of heavy atoms (nonhydrogen atoms).                                                                                                                                                                                                        |

Table S2: Calculated values of the physicochemical properties displaying non-zero variance across the 15 ligands of Table 1

|             | 1       | 2       | 3       | 4       | 5       | 6       | 7       | 8       | 9       | 10      | 11      | 12      | 13      | 14      | 15      |
|-------------|---------|---------|---------|---------|---------|---------|---------|---------|---------|---------|---------|---------|---------|---------|---------|
| X.stars     | 1.00    | 3.00    | 3.00    | 3.00    | 2.00    | 2.00    | 2.00    | 3.00    | 3.00    | 3.00    | 3.00    | 3.00    | 1.00    | 1.00    | 3.00    |
| X.rotor     | 3.00    | 3.00    | 3.00    | 3.00    | 3.00    | 3.00    | 3.00    | 3.00    | 3.00    | 3.00    | 4.00    | 4.00    | 4.00    | 5.00    | 3.00    |
| CNS         | 0.00    | 0.00    | 0.00    | 0.00    | 0.00    | 0.00    | 0.00    | 0.00    | 1.00    | 0.00    | 0.00    | 0.00    | -1.00   | -1.00   | 0.00    |
| mol.MW      | 456.58  | 470.61  | 470.61  | 470.61  | 474.57  | 474.57  | 474.57  | 491.02  | 525.47  | 535.48  | 522.59  | 540.58  | 534.67  | 486.61  | 524.58  |
| dipole      | 8.80    | 8.81    | 8.49    | 8.50    | 8.59    | 10.80   | 10.62   | 8.76    | 10.21   | 8.70    | 6.79    | 9.51    | 8.50    | 8.74    | 6.42    |
| SASA        | 810.51  | 824.70  | 842.70  | 842.71  | 818.32  | 819.51  | 819.55  | 826.43  | 846.08  | 829.35  | 848.01  | 845.30  | 854.55  | 840.34  | 847.94  |
| FOSA        | 442.04  | 498.59  | 530.17  | 530.23  | 436.94  | 442.06  | 442.05  | 435.90  | 435.45  | 435.58  | 461.45  | 439.67  | 493.28  | 465.77  | 428.27  |
| FISA        | 58.34   | 58.33   | 58.34   | 58.34   | 58.35   | 58.33   | 58.33   | 58.35   | 58.34   | 58.35   | 58.33   | 58.34   | 120.62  | 107.11  | 58.33   |
| PISA        | 310.13  | 267.78  | 254.19  | 254.15  | 286.60  | 272.14  | 272.14  | 276.48  | 239.37  | 275.06  | 251.82  | 249.14  | 240.66  | 267.45  | 259.62  |
| WPSA        | 0.00    | 0.00    | 0.00    | 0.00    | 36.43   | 46.98   | 47.02   | 55.70   | 112.92  | 60.36   | 76.41   | 98.14   | 0.00    | 0.00    | 101.72  |
| volume      | 1491.94 | 1536.28 | 1551.85 | 1551.91 | 1504.71 | 1508.06 | 1508.08 | 1527.19 | 1566.62 | 1534.36 | 1586.43 | 1589.81 | 1619.44 | 1558.62 | 1574.55 |
| donorHB     | 0.00    | 0.00    | 0.00    | 0.00    | 0.00    | 0.00    | 0.00    | 0.00    | 0.00    | 0.00    | 0.00    | 0.00    | 0.00    | 1.00    | 0.00    |
| acceptHB    | 5.25    | 5.25    | 5.25    | 5.25    | 5.25    | 5.25    | 5.25    | 5.25    | 5.25    | 5.25    | 5.25    | 5.25    | 9.25    | 6.95    | 5.25    |
| dip.2.V     | 0.05    | 0.05    | 0.05    | 0.05    | 0.05    | 0.08    | 0.07    | 0.05    | 0.07    | 0.05    | 0.03    | 0.06    | 0.04    | 0.05    | 0.03    |
| ACxDN..5.SA | 0.00    | 0.00    | 0.00    | 0.00    | 0.00    | 0.00    | 0.00    | 0.00    | 0.00    | 0.00    | 0.00    | 0.00    | 0.00    | 0.01    | 0.00    |
| glob        | 0.78    | 0.78    | 0.77    | 0.77    | 0.78    | 0.78    | 0.78    | 0.78    | 0.77    | 0.78    | 0.78    | 0.78    | 0.78    | 0.77    | 0.77    |
| QPpolrz     | 54.59   | 55.96   | 56.45   | 56.45   | 54.88   | 54.87   | 54.87   | 55.68   | 56.90   | 55.95   | 57.17   | 57.28   | 58.39   | 55.57   | 57.41   |
| QPlogPC16   | 14.81   | 14.91   | 15.04   | 15.04   | 14.55   | 14.41   | 14.41   | 15.31   | 15.85   | 15.40   | 14.79   | 14.64   | 15.91   | 15.73   | 14.61   |
| QPlogPoct   | 21.53   | 21.95   | 21.99   | 21.99   | 21.73   | 22.14   | 22.11   | 22.11   | 22.98   | 22.22   | 22.39   | 22.94   | 25.14   | 24.31   | 22.59   |
| QPlogPw     | 8.69    | 8.43    | 8.38    | 8.38    | 8.56    | 8.46    | 8.46    | 8.52    | 8.33    | 8.51    | 8.19    | 8.17    | 12.46   | 11.50   | 8.47    |
| QPlogPo.w   | 6.43    | 6.67    | 6.76    | 6.76    | 6.63    | 6.67    | 6.67    | 6.83    | 7.27    | 6.90    | 7.27    | 7.37    | 4.80    | 5.72    | 7.30    |
| QPlogS      | -8.34   | -8.61   | -8.95   | -8.95   | -8.65   | -8.71   | -8.71   | -8.88   | -9.51   | -8.96   | -9.22   | -9.26   | -6.92   | -8.11   | -9.49   |
| CIQlogS     | -7.44   | -7.74   | -7.74   | -7.74   | -7.82   | -7.82   | -7.82   | -8.17   | -8.90   | -9.11   | -8.84   | -9.22   | -7.24   | -7.43   | -8.88   |
| QPlogHERG   | -6.59   | -6.36   | -6.48   | -6.48   | -6.52   | -6.45   | -6.45   | -6.47   | -6.38   | -6.47   | -6.36   | -6.29   | -6.23   | -6.47   | -6.46   |
| QPPCaco     | 2771.38 | 2771.86 | 2771.29 | 2771.40 | 2770.64 | 2771.75 | 2771.50 | 2770.69 | 2770.91 | 2770.62 | 2771.72 | 2771.08 | 711.37  | 955.29  | 2771.80 |
| QPlogBB     | -0.26   | -0.26   | -0.28   | -0.28   | -0.17   | -0.15   | -0.15   | -0.13   | 0.01    | -0.12   | -0.14   | -0.08   | -1.00   | -0.93   | -0.02   |
| QPPMDCK     | 1488.85 | 1489.13 | 1488.80 | 1488.87 | 2356.68 | 2693.19 | 2694.29 | 3005.10 | 6185.16 | 3187.05 | 3903.73 | 5133.81 | 342.36  | 470.85  | 5371.79 |
| QPlogKp     | -1.21   | -1.36   | -1.41   | -1.41   | -1.30   | -1.35   | -1.35   | -1.33   | -1.46   | -1.34   | -1.32   | -1.33   | -2.51   | -2.07   | -1.39   |
| IP.eV.      | 8.74    | 8.73    | 8.73    | 8.73    | 8.72    | 8.82    | 8.83    | 8.72    | 8.77    | 8.70    | 8.70    | 8.74    | 8.74    | 8.72    | 8.83    |
| EA.eV.      | 0.51    | 0.51    | 0.51    | 0.51    | 0.49    | 0.54    | 0.56    | 0.50    | 0.52    | 0.49    | 0.48    | 0.49    | 0.60    | 0.51    | 0.53    |
| X.metab     | 7.00    | 8.00    | 8.00    | 8.00    | 7.00    | 7.00    | 7.00    | 7.00    | 7.00    | 7.00    | 8.00    | 8.00    | 7.00    | 8.00    | 8.00    |
| QPlogKhsa   | 1.42    | 1.55    | 1.59    | 1.59    | 1.45    | 1.46    | 1.46    | 1.52    | 1.63    | 1.54    | 1.65    | 1.66    | 0.68    | 1.25    | 1.66    |
| PercHOA     | 100.00  | 100.00  | 100.00  | 100.00  | 100.00  | 100.00  | 100.00  | 100.00  | 100.00  | 100.00  | 100.00  | 100.00  | 93.15   | 100.00  | 100.00  |
| SAfluorine  | 0.00    | 0.00    | 0.00    | 0.00    | 36.43   | 46.98   | 47.02   | 0.00    | 0.00    | 0.00    | 76.41   | 98.14   | 0.00    | 0.00    | 101.72  |
| PSA         | 64.00   | 63.69   | 63.99   | 64.00   | 64.81   | 63.99   | 64.00   | 64.37   | 64.33   | 64.30   | 71.24   | 70.08   | 96.66   | 86.01   | 63.48   |
| X.NandO     | 4.00    | 4.00    | 4.00    | 4.00    | 4.00    | 4.00    | 4.00    | 4.00    | 4.00    | 4.00    | 5.00    | 5.00    | 6.00    | 5.00    | 4.00    |
| RuleOffive  | 1.00    | 1.00    | 1.00    | 1.00    | 1.00    | 1.00    | 1.00    | 1.00    | 2.00    | 2.00    | 2.00    | 2.00    | 1.00    | 1.00    | 2.00    |
| X.nonHatm   | 34.00   | 35.00   | 35.00   | 35.00   | 35.00   | 35.00   | 35.00   | 35.00   | 36.00   | 35.00   | 38.00   | 39.00   | 38.00   | 36.00   | 38.00   |

Table S3. Statistics of the best predictive model for  $\delta EC_{50}$ .

|             | Estimate | Std. Error | t value | Pr(> t ) |
|-------------|----------|------------|---------|----------|
| (Intercept) | 225.1429 | 30.9535    | 7.27    | 0.0000   |
| SASA        | -0.1003  | 0.0168     | -5.97   | 0.0001   |
| PISA        | -0.0606  | 0.0125     | -4.86   | 0.0005   |
| IP.eV.      | -14.2752 | 2.4131     | -5.92   | 0.0001   |

Table S4. Statistics of the best predictive model for  $\mu$  EC<sub>50</sub>.

|             | Estimate | Std. Error | t value | Pr(> t ) |
|-------------|----------|------------|---------|----------|
| (Intercept) | 6.7258   | 1.7255     | 3.90    | 0.0025   |
| mol.MW      | -0.0220  | 0.0040     | -5.56   | 0.0002   |
| PSA         | -0.0989  | 0.0265     | -3.74   | 0.0033   |
| X.NandO     | 2.3097   | 0.4570     | 5.05    | 0.0004   |

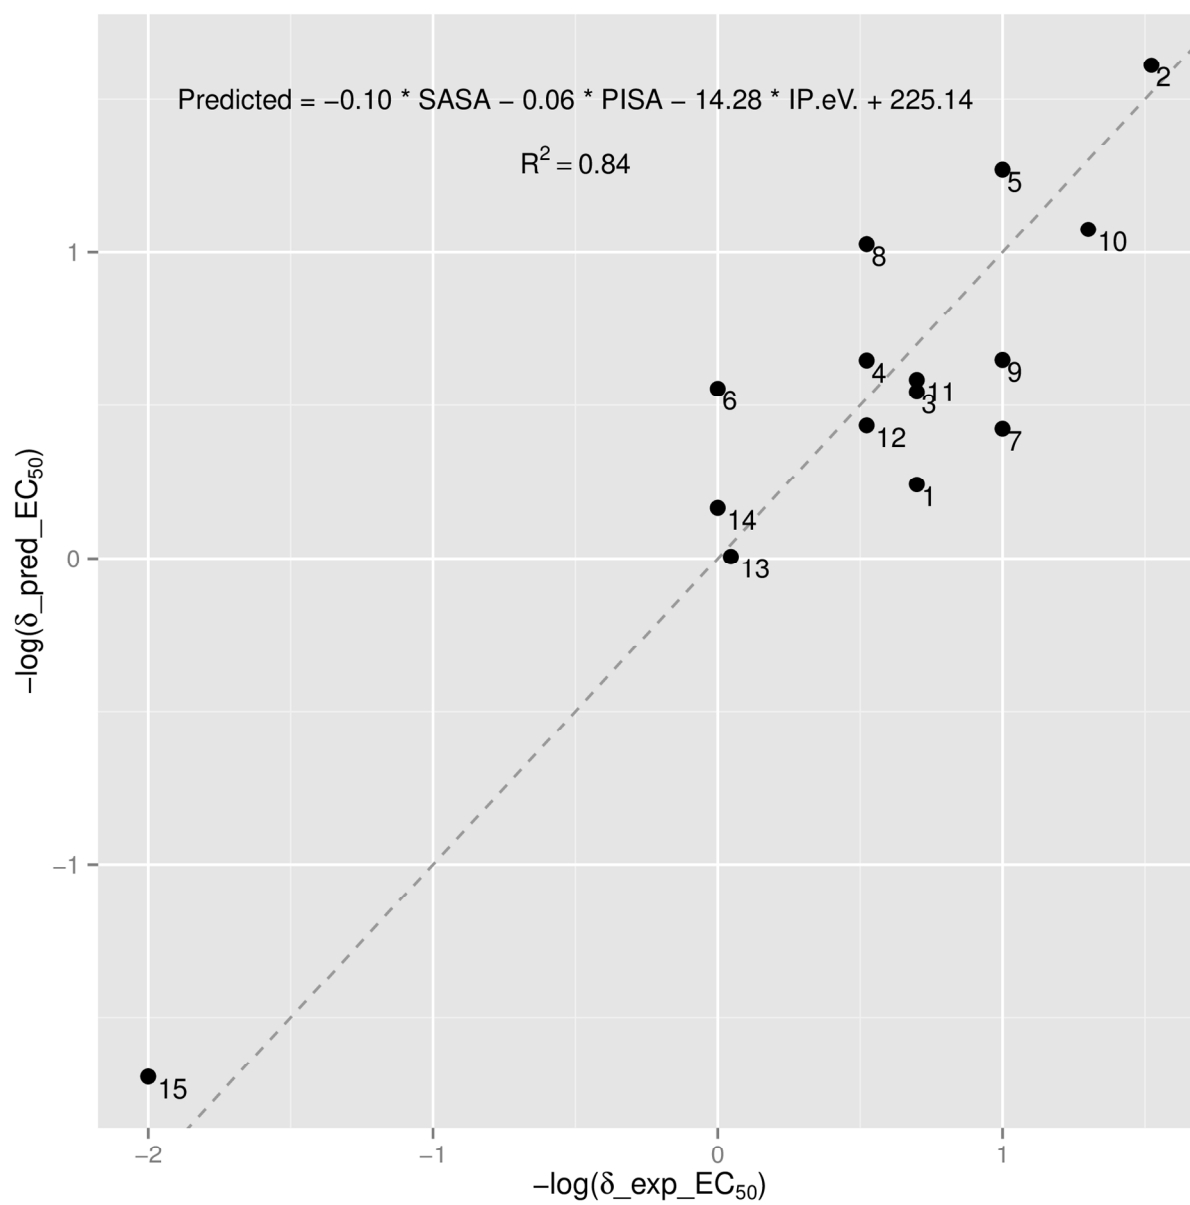

Figure S1. Predictive model for  $\delta \text{EC}_{50}$ . Numbered black dots represent each individual compound in Table 1.  $\delta_{\text{exp\_EC}_{50}}$  and  $\delta_{\text{pred\_EC}_{50}}$  stand for experimental  $\delta \text{EC}_{50}$  and predicted  $\delta \text{EC}_{50}$ , respectively. The ideal correlation is indicated by a dotted line.

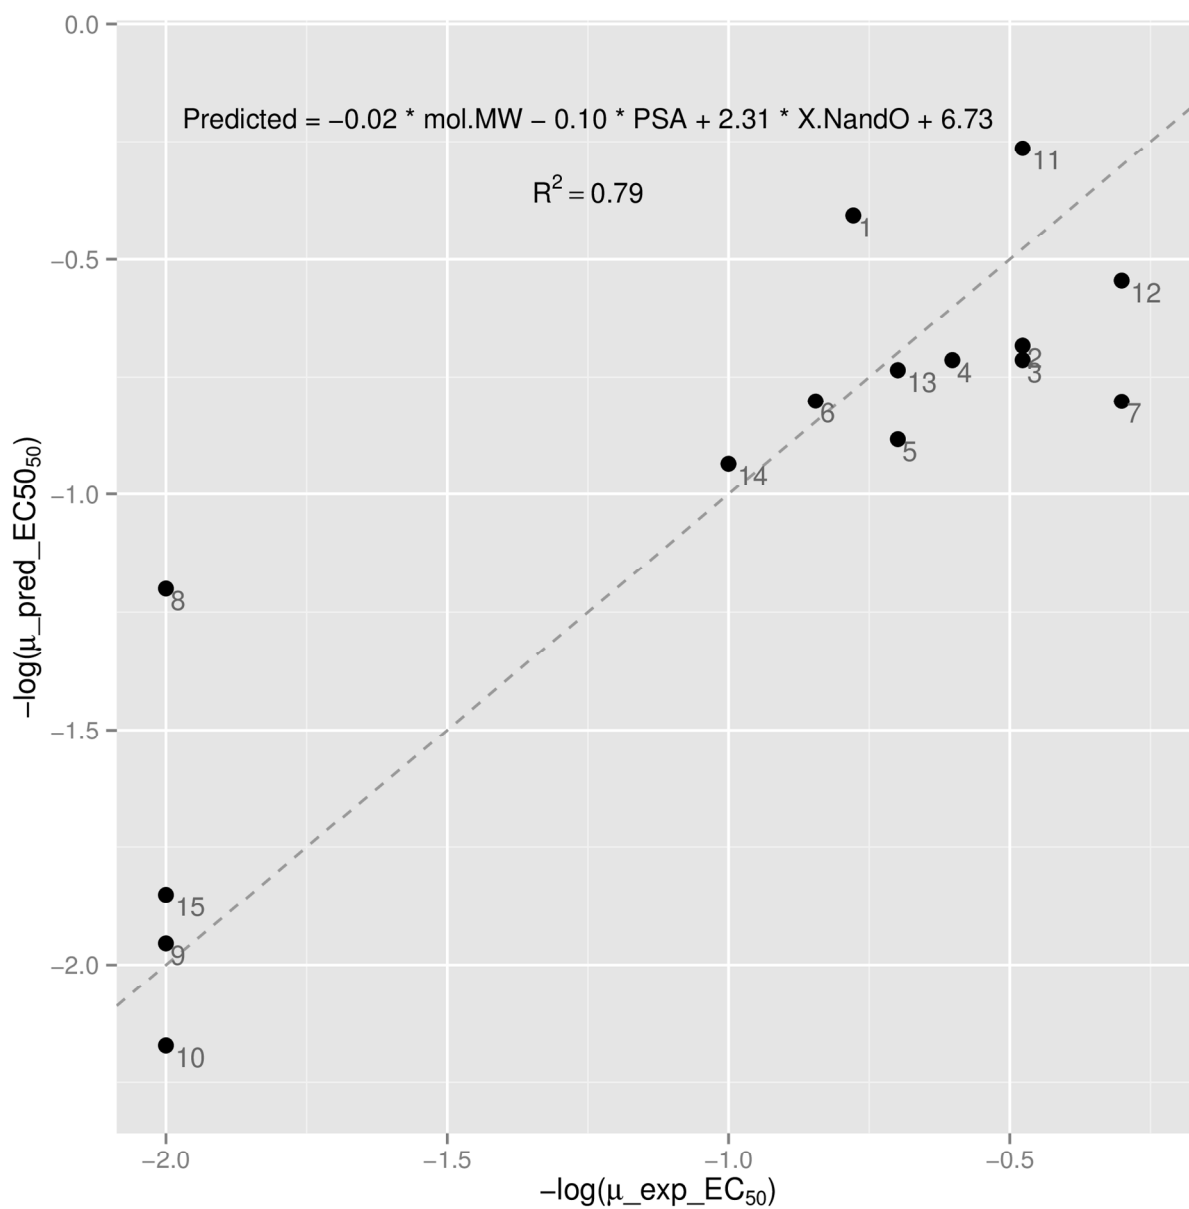

Figure S2. Predictive model for  $\mu$  EC<sub>50</sub>. Numbered black dots represent each individual compound in Table 1.  $\mu_{\text{exp\_EC50}}$  and  $\mu_{\text{pred\_EC50}}$  stand for experimental  $\mu$  EC<sub>50</sub> and predicted  $\mu$  EC<sub>50</sub>, respectively. The ideal correlation is indicated by a dotted line.



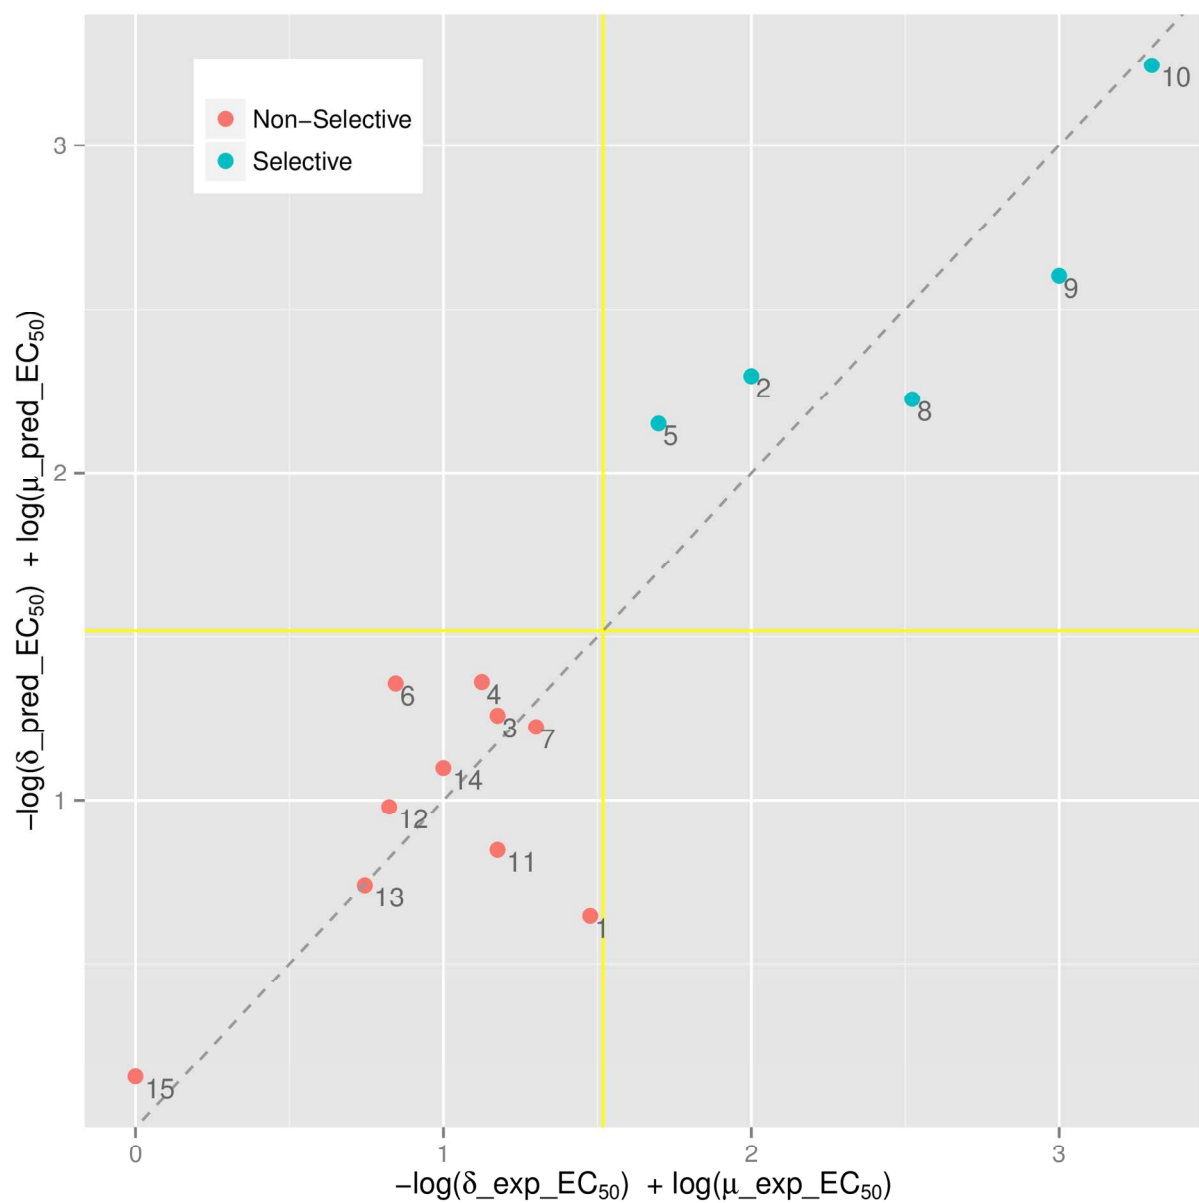

Figure S3. Predictive model for  $\delta/\mu$  selectivity (arbitrarily set to more than 33-fold). Selective and non-selective compounds are represented as red and blue dots, respectively. The ideal correlation is indicated by a dotted line. The yellow lines indicate the 33-fold selectivity cut-off.
